# Supplementary material for: Development of key indicators to quantify the health impacts of climate change on Canadians
Source: PubMed Central journal article supplement (PMC3907783; doi:10.1007/s00038-013-0499-5), 2013-07-30
Supplement: 38_2013_499_MOESM1_ESM.pdf [file 38_2013_499_MOESM1_ESM.pdf]

## **Online Resource: Supplemental Materials**

### **Development of Key Indicators to Quantify the Health Impacts of Climate Change on Canadians**

June J. Cheng MD MPH<sup>1,2\*</sup> and Peter Berry PhD<sup>2</sup>

<sup>1</sup> Public Health and Preventive Medicine Residency, Department of Clinical Epidemiology & Biostatistics, McMaster University, Hamilton, Ontario, Canada

Email: [june.cheng@medportal.ca](mailto:june.cheng@medportal.ca)

<sup>2</sup> Climate Change and Health Office, Health Canada, Ottawa, Ontario, Canada

\* Corresponding Author

#### **Table of Contents**

|                                                                                              |        |
|----------------------------------------------------------------------------------------------|--------|
| Table S1. Existing climate change and health indicators due to temperature extremes          | Pg. 2  |
| Table S2. Existing climate change and health indicators due to air pollution                 | Pg. 4  |
| Table S3. Existing climate change and health indicators due to extreme weather events        | Pg. 5  |
| Table S4. Existing climate change and health indicators due to food and water contamination  | Pg. 6  |
| Table S5. Existing climate change and health indicators due to infectious diseases           | Pg. 7  |
| Table S6. Existing climate change and health indicators due to stratospheric ozone depletion | Pg. 8  |
| Table S7. Other existing climate change and health indicators                                | Pg. 9  |
| Table S8. Potential criteria for evaluating proposed climate change and health indicators    | Pg. 10 |
| Supplemental Materials References                                                            | Pg. 12 |

**Supplemental Material, Table S1. Existing climate change and health indicators due to temperature extremes**

| <b>Indicator</b>                                                                                                              | <b>Used By</b>                                                                                                                                                                                                                                                                                                                                                                                                                                                                                                         |
|-------------------------------------------------------------------------------------------------------------------------------|------------------------------------------------------------------------------------------------------------------------------------------------------------------------------------------------------------------------------------------------------------------------------------------------------------------------------------------------------------------------------------------------------------------------------------------------------------------------------------------------------------------------|
| Excess daily all-cause mortality due to heat                                                                                  | Armstrong et al. 2011; Baccini et al. 2009; Ballester et al. 2011; Barnett et al. 2012; Davis et al. 2003a; Davis et al. 2003b; Dessai 2003; Doherty et al. 2009; Donaldson et al. 2003; Gosling et al. 2007; Green et al. 2012; Hoshiko et al. 2010; Kalkstein 1993; Kalkstein 1991; Kalkstein and Greene 1997; Knowlton et al. 2007; Michelozzi et al. 2010; Robine et al. 2008; Dalbokova et al. 2009; WHO Regional Office for Europe 2011; English et al. 2009; California EPA 2009; Smoyer-Tomic and Rainham 2001 |
| Daily all-cause mortality                                                                                                     | Burkart et al. 2011; D'Ippoliti et al. 2010; Doyon et al. 2008; Fouillet et al. 2007; Gabriel and Endlicher 2011; Huynen et al. 2001; Iniguez et al. 2010; Kim et al. 2006; Laaidi et al. 2006; Langford and Bentham 1995; Martens 1998; McMichael et al. 2008; O'Neill et al. 2005; Rocklov and Forsberg 2010; Williams et al. 2012; Yu et al. 2011; Yu et al. 2012                                                                                                                                                   |
| Daily non-accidental mortality                                                                                                | Kan et al. 2007; Martin et al. 2011; Montero et al. 2012; O'Neill et al. 2003; Pengelly et al. 2007; Revich and Shaposhnikov 2010; Tong et al. 2010                                                                                                                                                                                                                                                                                                                                                                    |
| Daily cardiovascular mortality                                                                                                | Burkart et al. 2011; Huynen et al. 2001; Kan et al. 2007; Martens 1998; Revich and Shaposhnikov 2010; Tong et al. 2010; Yu et al. 2011                                                                                                                                                                                                                                                                                                                                                                                 |
| Daily respiratory mortality                                                                                                   | Huynen et al. 2001; Kan et al. 2007; Martens 1998                                                                                                                                                                                                                                                                                                                                                                                                                                                                      |
| Neoplasm mortality                                                                                                            | Huynen et al. 2001                                                                                                                                                                                                                                                                                                                                                                                                                                                                                                     |
| Myocardial infarction mortality                                                                                               | Crawford et al. 2003                                                                                                                                                                                                                                                                                                                                                                                                                                                                                                   |
| Daily mortality = deaths due to cardiovascular disease + deaths due to respiratory disease + deaths due to all other diseases | Curriero et al. 2002                                                                                                                                                                                                                                                                                                                                                                                                                                                                                                   |
| Heat deaths during summer months                                                                                              | English et al. no date                                                                                                                                                                                                                                                                                                                                                                                                                                                                                                 |
| Deaths due to heat stroke or heat exhaustion                                                                                  | National Environmental Public Health Tracking Program 2012                                                                                                                                                                                                                                                                                                                                                                                                                                                             |
| Deaths due to heat                                                                                                            | McGeehin and Mirabelli 2001                                                                                                                                                                                                                                                                                                                                                                                                                                                                                            |
| Hospital admissions (all)                                                                                                     | McGeehin and Mirabelli 2001                                                                                                                                                                                                                                                                                                                                                                                                                                                                                            |
| Hospital visits for cardiovascular diseases                                                                                   | McGeehin and Mirabelli 2001                                                                                                                                                                                                                                                                                                                                                                                                                                                                                            |
| Deaths due to cardiovascular and respiratory diseases                                                                         | McGeehin and Mirabelli 2001                                                                                                                                                                                                                                                                                                                                                                                                                                                                                            |
| Hospital admission excess for electrolyte imbalance, acute renal failure, nephritis, and heat related illnesses               | Knowlton et al. 2011                                                                                                                                                                                                                                                                                                                                                                                                                                                                                                   |
| Excess morbidity due to heat (emergency room visits and hospitalizations during summer months)                                | English et al. 2009; California EPA 2009                                                                                                                                                                                                                                                                                                                                                                                                                                                                               |
| Hospital admissions for renal diseases, acute renal failure, and dialysis                                                     | Hansen et al. 2008                                                                                                                                                                                                                                                                                                                                                                                                                                                                                                     |
| Hospital admissions for cardiovascular, cerebrovascular,                                                                      | Michelozzi et al. 2009                                                                                                                                                                                                                                                                                                                                                                                                                                                                                                 |

|                                                 |                                                                         |
|-------------------------------------------------|-------------------------------------------------------------------------|
| and respiratory causes                          |                                                                         |
| Fire dispatches for heat-related medical events | Golden et al. 2008                                                      |
| Ambulance calls for heat-related illness        | Bassil et al. 2011                                                      |
| ED presentations (all)                          | Williams et al. 2012; McGeehin and Mirabelli 2001; Knowlton et al. 2011 |

**Supplemental Material, Table S2. Existing climate change and health indicators due to air pollution**

| <b>Indicator</b>                                                                          | <b>Used By</b>                                                                         |
|-------------------------------------------------------------------------------------------|----------------------------------------------------------------------------------------|
| Avoidable deaths due to PM exposure                                                       | Anonymous 1997                                                                         |
| Premature deaths due to air pollution (ozone and PM2.5)                                   | Tagaris et al. 2010; Tagaris et al. 2009                                               |
| COPD mortality among adult women                                                          | Bailis et al. 2005                                                                     |
| Lower respiratory infection mortality among children <5                                   | Bailis et al. 2005                                                                     |
| Neonatal, infant, and elder mortality                                                     | Cifuentes et al. 2001                                                                  |
| Bronchitis: chronic and acute incidence and prevalence                                    | Cifuentes et al. 2001                                                                  |
| Asthma attack incidence and prevalence                                                    | Cifuentes et al. 2001                                                                  |
| Lower & upper respiratory illness symptom incidence and prevalence                        | Cifuentes et al. 2001                                                                  |
| Days of work lost                                                                         | Cifuentes et al. 2001                                                                  |
| Moderate or worse asthma status prevalence                                                | Cifuentes et al. 2001                                                                  |
| Days with restricted activity                                                             | Cifuentes et al. 2001                                                                  |
| Mortality due to smoke inhalation                                                         | Knowlton et al. 2011                                                                   |
| Asthma incidence                                                                          | Beggs and Bambrick 2005; D'Amato et al. 2010; Shea et al. 2008                         |
| Asthma prevalence                                                                         | Beggs and Bambrick 2005; Shea et al. 2008; Weiland et al. 2004; McMichael et al. 2004  |
| Atopic Eczema prevalence                                                                  | Weiland et al. 2004                                                                    |
| Allergic respiratory disease incidence                                                    | D'Amato et al. 2010                                                                    |
| Daily non-accidental mortality                                                            | Chang et al. 2010; Johnston et al. 2011; Park et al. 2011                              |
| Daily respiratory mortality                                                               | Johnston et al. 2011; Park et al. 2011                                                 |
| Daily cardiovascular mortality                                                            | Johnston et al. 2011; Park et al. 2011                                                 |
| Daily non-accidental + respiratory + cardiovascular mortality                             | Yi et al. 2010                                                                         |
| Hospital admissions for cardiovascular and respiratory diseases                           | Yi et al. 2010; Cifuentes et al. 2001; Knowlton et al. 2011                            |
| ER visits for asthma and wheeze                                                           | Darrow et al. 2012; Sheffield et al. 2011; Cifuentes et al. 2001; Knowlton et al. 2011 |
| Daily mortality due to ozone                                                              | Doherty et al. 2009; Knowlton et al. 2004; West et al. 2006; Knowlton et al. 2011      |
| Cardio-respiratory mortality                                                              | WHO Regional Office for Europe 2011; McMichael et al. 2004                             |
| Acute respiratory illnesses                                                               | McMichael et al. 2004                                                                  |
| Lung CA                                                                                   | McMichael et al. 2004                                                                  |
| Anti-allergy medication sales                                                             | WHO Regional Office for Europe 2011                                                    |
| All-cause mortality                                                                       | Kalkstein 1991                                                                         |
| Respiratory/allergic disease and mortality related to increased air pollution and pollens | English et al. 2009                                                                    |

**Supplemental Material, Table S3. Existing climate change and health indicators due to extreme weather events**

| <b>Indicator</b>                                                            | <b>Used By</b>                                                               |
|-----------------------------------------------------------------------------|------------------------------------------------------------------------------|
| Disaster Mortality                                                          | Seguin 2008; Greenough et al. 2001; Myung and Jang 2011; English et al. 2009 |
| Injuries and deaths due to extreme weather events                           | English et al. no date                                                       |
| Excess accidental and non-accidental deaths                                 | Anderson and Bell 2012                                                       |
| Mortality during cyclones                                                   | Haque et al. 2012                                                            |
| Hurricane related deaths                                                    | Knowlton et al. 2011                                                         |
| Mortality from flooding                                                     | Knowlton et al. 2011                                                         |
| ER visits                                                                   | Knowlton et al. 2011                                                         |
| Mortality due to wildfire or mudslides                                      | Knowlton et al. 2011                                                         |
| Psychological Distress (>4 on 12 item General Health Questionnaire (GHQ12)) | Reacher et al. 2004                                                          |
| Hospital admissions associated with diarrhea                                | Chou et al. 2010                                                             |
| Infectious and non-infectious diarrhea incidence                            | Chou et al. 2010                                                             |

**Supplemental Material, Table S4. Existing climate change and health indicators due to food and water contamination**

| <b>Indicator</b>                        | <b>Used By</b>                                                                                  |
|-----------------------------------------|-------------------------------------------------------------------------------------------------|
| Cryptosporidiosis incidence             | Britton et al. 2010; Hu et al. 2010; WHO Regional Office for Europe 2011; Dalbokova et al. 2009 |
| Samonellosis incidence and seasonality  | WHO Regional Office for Europe 2011; Dalbokova et al. 2009                                      |
| Giardiasis incidence                    | Britton et al. 2010                                                                             |
| Enteric protozoa infection surveillance | Fletcher et al. 2012                                                                            |
| Gastroenteritis cases                   | Hall et al. 2011                                                                                |
| Bacillary dysentery cases               | Zhang et al. 2007b; Zhang et al. 2008                                                           |
| Cholera prevalence                      | Reyburn et al. 2011                                                                             |

**Supplemental Material, Table S5. Existing climate change and health indicators due to infectious diseases**

| <b>Indicator</b>                              | <b>Used By</b>                                                                                                             |
|-----------------------------------------------|----------------------------------------------------------------------------------------------------------------------------|
| Incidence of Japanese encephalitis            | Bi et al. 2007                                                                                                             |
| Tick-Borne Encephalitis incidence (in humans) | Daniel et al. 2011                                                                                                         |
| West Nile Virus disease incidence (in humans) | DeGroot et al. 2008; Wang et al. 2010; English et al. 2009; English et al. no date; Knowlton et al. 2011                   |
| Hospital admission for viral pneumonia        | Ebi et al. 2001                                                                                                            |
| Dengue incidence                              | Russell et al. 2009; English et al. no date                                                                                |
| Human cases of hantavirus                     | English et al., no date                                                                                                    |
| Human cases of Valley fever                   | English et al., no date                                                                                                    |
| Malaria Prevalence                            | Martens 1995; Gething et al. 2010                                                                                          |
| Incidence lyme borreliosis                    | Odgen et al. 2008; WHO Regional Office for Europe 2011; Dalbokova et al. 2009; English et al. 2009; English et al. no date |

**Supplemental Material, Table S6. Existing climate change and health indicators due to stratospheric ozone depletion**

| <b>Indicator</b>             | <b>Used By</b>       |
|------------------------------|----------------------|
| Skin Cancer Incidence        | DARA 2012            |
| Pemphigus vulgaris incidence | Kyriakis et al. 1995 |



**Supplemental Material, Table S7. Other existing climate change and health indicators**

| <b>Indicator</b>                       | <b>Used By</b>                           |
|----------------------------------------|------------------------------------------|
| Preventable deaths from climate change | Cole 2009                                |
| DALYs lost from climate change         | Costello et al. 2009; Zhang et al. 2007a |
| Malnutrition, food insecurity          | Darnton-Hill and Cogill 2010             |

**Supplemental Material, Table S8. Potential criteria for evaluating proposed climate change and health indicators**

| <b>Framework/Organization</b>                                                               | <b>Criteria</b>                                                                                                                                                                                                                                               |
|---------------------------------------------------------------------------------------------|---------------------------------------------------------------------------------------------------------------------------------------------------------------------------------------------------------------------------------------------------------------|
| Demographic & Health Indicators selected by Statistics Canada<br>Peron and Strohmenger 1985 | Availability or feasibility<br>Stability of sources and objectivity of calculation<br>Intelligibility                                                                                                                                                         |
| Association of Public Health Epidemiologists of Ontario, no date                            | Applicable to outcomes from Ontario Public Health Standards<br>Useful<br>Meaningful<br>Relevant to health status<br>Applicable data available to all or most local public health units<br>Core indicator important to public health<br>Decisions by consensus |
| Ontario District Health Councils, no date                                                   | Validity<br>Feasibility<br>Understandable<br>Relevance to planning<br>Comparability over time and place<br>Amenable to action<br>Quality acceptable                                                                                                           |
| NHS Institute for Innovation and Improvement 2008                                           | Important (measures important issue)<br>Valid<br>Feasible/possible<br>Reliable                                                                                                                                                                                |
| National Collaborating Centre for Methods and Tools 2010                                    | Evaluation<br>Validity<br>Reliability<br>Methodological rating                                                                                                                                                                                                |
| United States Environmental Protection Agency 2012                                          | Usefulness<br>Objectivity<br>Data quality<br>Transparency<br>Ability to show a meaningful trend<br>Relevance to climate change                                                                                                                                |
| National Research Council Board on Atmospheric Sciences and Climate 2010                    | Direct<br>Significant<br>Dominant<br>Measureable<br>Historical<br>Well-documented                                                                                                                                                                             |
| California EPA 2009                                                                         | Availability                                                                                                                                                                                                                                                  |
| English et al. No date                                                                      | Data quality/completeness<br>Availability<br>Temporality<br>Sensitivity<br>Overall-readiness reported from previous 4 characteristics                                                                                                                         |
| English et al. 2009                                                                         | Availability<br>Temporality<br>Completeness                                                                                                                                                                                                                   |
| Wardekker et al. 2012                                                                       | Level of precision rated by experts on a variety of                                                                                                                                                                                                           |

|                      |                                                                                                                                                                                                                                                                                                                                                                                                                                                          |
|----------------------|----------------------------------------------------------------------------------------------------------------------------------------------------------------------------------------------------------------------------------------------------------------------------------------------------------------------------------------------------------------------------------------------------------------------------------------------------------|
|                      | climate change and health indicators for the Netherlands                                                                                                                                                                                                                                                                                                                                                                                                 |
| Hambling et al. 2012 | Credible<br>Specific<br>Actionable<br>Sensitive to changes in climate and less sensitive to alternate explanations<br>Relevant to an issue of policy<br>Sustainable<br>Consistent and comparable over time and space<br>Scalable<br>Robust<br>Unbiased and representative<br>Explicit<br>Accurate<br>Understandable, applicable, acceptable to stakeholders potential users<br>Measurable<br>Cost-effective<br>Selective<br>Available in a timely manner |

## Supplemental Materials References

Anonymous (1997) Short-term improvements in public health from global-climate policies on fossil-fuel combustion: An interim report. Working group on public health and fossil-fuel combustion. *Lancet* 350(9088):1341-1349

Anderson GB, Bell ML (2012) Lights out: Impact of the august 2003 power outage on mortality in New York, NY. *Epidemiol* 23(2):189-193

Armstrong BG, Chalabi Z, Fenn B, Hajat S, Kovats S, Milojevic A et al. (2011) Association of mortality with high temperatures in a temperate climate: England and Wales. *J Epidemiol & Community Health* 65(4):340-345

Association of Public Health Epidemiologists of Ontario (No date) The Core Indicators for Public Health in Ontario. [http://www.apheo.ca/resources/indicators/APHEO\\_Core%20Indicators%20brochure.pdf](http://www.apheo.ca/resources/indicators/APHEO_Core%20Indicators%20brochure.pdf). Accessed January 4, 2013

Baccini M, Kosatsky T, Analitis A, Anderson HR, D'Ovidio M, Menne B et al. (2011) Impact of heat on mortality in 15 European cities: Attributable deaths under different weather scenarios. *J Epidemiol & Community Health* 65(1):64-70

Bailis R, Ezzati M, Kammen DM (2005) Mortality and greenhouse gas impacts of biomass and petroleum energy futures in Africa. *Science* 308(5718):98-103

Ballester J, Robine JM, Herrmann FR, Rodo X (2011) Long-term projections and acclimatization scenarios of temperature-related mortality in Europe. *Nature commun* 2:358

Barnett AG, Hajat S, Gasparrini A, Rocklöv J (2012) Cold and heat waves in the United States. *Environ Res* 112:218-224

Bassil KL, Cole DC, Moineddin R, Lou W, Craig AM, Schwartz B et al. (2011) The relationship between temperature and ambulance response calls for heat-related illness in Toronto, Ontario, 2005. *J Epidemiol & Community Health* 65(9):829-831

Beggs PJ, Bambrick HJ (2005) Is the global rise of asthma an early impact of anthropogenic climate change? *Environ Health Perspect* 113(8):915-919

Bi P, Zhang Y, Parton KA (2007) Weather variables and Japanese encephalitis in the metropolitan area of Jinan City, China. *J Infect* 55(6):551-556

- Britton E, Hales S, Venugopal K, Baker MG (2010) The impact of climate variability and change on Cryptosporidiosis and Giardiasis rates in New Zealand. *J Water & Health* 8(3):561-571
- Burkart K, Schneider A, Breitner S, Khan MH, Kramer A, Endlicher W (2011) The effect of atmospheric thermal conditions and urban thermal pollution on all-cause and cardiovascular mortality in Bangladesh. *Environ Pollution* 159(8-9):2035-2043
- California Environmental Protection Agency (2009) Indicators of Climate Change in California Report Summary. <http://www.oehha.ca.gov/multimedia/epic/pdf/ClimateSummary.pdf>. Accessed January 3, 2013
- Chang HH, Zhou J, Fuentes M (2010) Impact of climate change on ambient ozone level and mortality in southeastern United States. *Int J Environ Res & Public Health* 7(7):2866-2880
- Chou WC, Wu JL, Wang YC, Huang H, Sung FC, Chuang CY (2010) Modeling the impact of climate variability on diarrhea-associated diseases in Taiwan (1996-2007). *Sci Total Environ* 409(1):43-51
- Cifuentes L, Borja-Aburto VH, Gouveia N, Thurston G, Davis DL (2001) Assessing the health benefits of urban air pollution reductions associated with climate change mitigation (2000-2020): Santiago, Sao Paulo, Mexico City, and New York City. *Environ Health Perspect* 109(Suppl 3):419-425
- Cole A (2009) Annual deaths from climate change could reach half a million by 2030. *BMJ* 338:b2227
- Costello A, Abbas M, Allen A, Ball S, Bell S, Bellamy R et al. (2009) Managing the health effects of climate change: Lancet and University College London Institute for Global Health Commission. *Lancet* 373(9676):1693-1733
- Crawford VL, McCann M, Stout RW (2003) Changes in seasonal deaths from myocardial infarction. *QJM* 96(1):45-52
- Curriero FC, Heiner KS, Samet JM, Zeger SL, Strug L, Patz JA (2002) Temperature and mortality in 11 cities of the eastern United States. *Am J Epidemiol* 155(1):80-87
- Dalbokova D, Krzyzanowski M, Menne B, Matthies F (2009) Development of Health-Relevant Indicators of Climate Change for Europe. *Epidemiol* 20(6):S57 Abstracts: ISEE 21st Annual Conference, Dublin, Ireland, August 25-29, 2009: Oral Presentations Dalbokova as cited in English et al. no date.

D'Amato G, Cecchi L, D'Amato M, Liccardi G (2010) Urban air pollution and climate change as environmental risk factors of respiratory allergy: An update. *J Investig Allerg & Clin Immunol* 20(2):95-102

Daniel M, Benes C, Danielova V, Kriz B (2011) Sixty years of research of tick-borne encephalitis--a basis of the current knowledge of the epidemiological situation in central Europe. *Epidemiol, Mikrobiol, Imunol* 60(4):135-155

DARA (2012) Climate Vulnerability Monitor: a guide to the cold calculus of a hot planet. 2<sup>nd</sup> edition. Geneva:DARA. <http://daraint.org/climate-vulnerability-monitor/climate-vulnerability-monitor-2012/report/>. Accessed January 13, 2013

Darnton-Hill I, Cogill B (2010) Maternal and young child nutrition adversely affected by external shocks such as increasing global food prices. *J Nutr* 140(1):162S-9S

Darrow LA, Hess J, Rogers CA, Tolbert PE, Klein M, Sarnat SE (2012) Ambient pollen concentrations and emergency department visits for asthma and wheeze. *J Allerg & Clin Immunol* 130(3):630-638.e4

Davis RE, Knappenberger PC, Michaels PJ, Novicoff WM (2003) Changing heat-related mortality in the United States. *Environ Health Perspect* 111(14):1712-1718

Davis RE, Knappenberger PC, Novicoff WM, Michaels PJ (2003) Decadal changes in summer mortality in U.S. cities. *Int J Biometeorol* 47(3):166-175

DeGroot JP, Sugumaran R, Brend SM, Tucker BJ, Bartholomay LC (2008) Landscape, demographic, entomological, and climatic associations with human disease incidence of West Nile virus in the state of Iowa, USA. *Int J Health Geogr* 7:19

Dessai S (2002) Heat stress and mortality in Lisbon Part I. model construction and validation. *Int J Biometeorol* 47(6):6-12

D'Ippoliti D, Michelozzi P, Marino C, de'Donato F, Menne B, Katsouyanni K et al. (2010) The impact of heat waves on mortality in 9 European cities: Results from the EuroHEAT project. *Environ Health* 9:37

Doherty RM, Heal MR, Wilkinson P, Pattenden S, Vieno M, Armstrong B et al. (2009) Current and future climate- and air pollution-mediated impacts on human health. *Environ Health* 8(Suppl 1):S8

Donaldson GC, Keatinge WR, Nayha S (2003) Changes in summer temperature and heat-related mortality since 1971 in North Carolina, South Finland, and Southeast England. *Environ Res* 91(1):1-7

Doyon B, Belanger D, Gosselin P (2008) The potential impact of climate change on annual and seasonal mortality for three cities in Quebec, Canada. *Int J Health Geogr* 7:23

Ebi KL, Exuzides KA, Lau E, Kelsh M, Barnston A (2001) Association of normal weather periods and El Nino events with hospitalization for viral pneumonia in females: California, 1983-1998. *Am J Public Health* 91(8):1200-1208

English PB, Sinclair AH, Ross Z, Anderson H, Boothe V, Davis C et al. (2009) Environmental health indicators of climate change for the United States: Findings from the state environmental health indicator collaborative. *Environ Health Perspect* 117(11):1673-1681

English P, Green M, Shaw S, Anderson H, Malecki K, Givens M, Christenson M, Patz J, Lin S (No date) Discussion paper for National Climate Assessment. Environmental Health Indicators for Climate Change. As part of the Climate Change Indicators Subcommittee of The Council of State and Territorial Epidemiologists.

Fletcher SM, Stark D, Harkness J, Ellis J (2012) Enteric protozoa in the developed world: A public health perspective. *Clin Microbiol Rev* 25(3):420-449

Fouillet A, Rey G, Jouglu E, Frayssinet P, Bessemoulin P, Hemon D (2007) A predictive model relating daily fluctuations in summer temperatures and mortality rates. *BMC Public Health* 7:114

Gabriel KM, Endlicher WR (2011) Urban and rural mortality rates during heat waves in Berlin and Brandenburg, Germany. *Environ Pollut* 159(8-9):2044-2050

Gething PW, Smith DL, Patil AP, Tatem AJ, Snow RW, Hay SI (2010) Climate change and the global malaria recession. *Nature* 465(7296):342-345

Golden JS, Hartz D, Brazel A, Lubber G, Phelan P (2008) A biometeorology study of climate and heat-related morbidity in Phoenix from 2001 to 2006. *Int J Biometeorol* 52(6):471-480

Gosling SN, McGregor GR, Paldy A (2007) Climate change and heat-related mortality in six cities part 1: Model construction and validation. *Int J Biometeorol* 51(6):525-540

Green HK, Andrews NJ, Bickler G, Pebody RG (2012) Rapid estimation of excess mortality: Nowcasting during the heatwave alert in England and Wales in June 2011. *J Epidemiol & Community Health* 66(10):866-868

- Greenough G, McGeehin M, Bernard SM, Trtanj J, Riad J, Engelberg D (2001) The potential impacts of climate variability and change on health impacts of extreme weather events in the United States. *Environ Health Perspect* 109(Suppl 2):191-198
- Hall GV, Hanigan IC, Dear KB, Vally H (2011) The influence of weather on community gastroenteritis in Australia. *Epidemiol & Infect* 139(6):927-936
- Hambling T, Weinstein P, Slaney D (2011) A review of frameworks for developing environmental health indicators for climate change and health. *Int J Environ Res & Public Health* 8(7):2854-2875
- Hansen AL, Bi P, Ryan P, Nitschke M, Pisaniello D, Tucker G (2008) The effect of heat waves on hospital admissions for renal disease in a temperate city of Australia. *Int J Epidemiol* 37(6):1359-1365
- Haque U, Hashizume M, Kolivras KN, Overgaard HJ, Das B, Yamamoto T (2012) Reduced death rates from cyclones in Bangladesh: What more needs to be done?. *Bull World Health Organ* 90(2):150-156
- Hoshiko S, English P, Smith D, Trent R (2010) A simple method for estimating excess mortality due to heat waves, as applied to the 2006 California heat wave. *Int J Public Health* 55(2):133-137
- Huynen MM, Martens P, Schram D, Weijenberg MP, Kunst AE (2001) The impact of heat waves and cold spells on mortality rates in the Dutch population. *Environ Health Perspect* 109(5):463-470
- Iniguez C, Ballester F, Ferrandiz J, Perez-Hoyos S, Saez M, Lopez A et al. (2010) Relation between temperature and mortality in thirteen Spanish cities. *Int J Environ Res & Public Health* 7(8):3196-3210
- Johnston F, Hanigan I, Henderson S, Morgan G, Bowman D (2011) Extreme air pollution events from bushfires and dust storms and their association with mortality in Sydney, Australia 1994-2007. *Environ Res* 111(6):811-816
- Kalkstein LS (1991) A new approach to evaluate the impact of climate on human mortality. *Environ Health Perspect* 96:145-150
- Kalkstein LS (1993) Health and climate change. Direct impacts in cities. *Lancet* 342(8884):1397-1399
- Kalkstein LS, Greene JS (1997) An evaluation of climate/mortality relationships in large U.S. cities and the possible impacts of a climate change. *Environ Health Perspect* 105(1):84-93
- Kan H, London SJ, Chen H, Song G, Chen G, Jiang L et al. (2007) Diurnal temperature range and daily mortality in Shanghai, China. *Environ Res* 103(3):424-431



- Kim H, Ha JS, Park J (2006) High temperature, heat index, and mortality in 6 major cities in South Korea. *Arch Environ & Occup Health* 61(6):265-270
- Knowlton K, Lynn B, Goldberg RA, Rosenzweig C, Hogrefe C, Rosenthal JK et al. (2007) Projecting heat-related mortality impacts under a changing climate in the New York City region. *Am J Public Health* 97(11):2028-2034
- Knowlton K, Rosenthal JE, Hogrefe C, Lynn B, Gaffin S, Goldberg R et al. (2004) Assessing ozone-related health impacts under a changing climate. *Environ Health Perspect* 112(15):1557-1563
- Knowlton K, Rotkin-Ellman M, Geballe L, Max W, Solomon GM (2011) Six climate change-related events in the United States accounted for about \$14 billion in lost lives and health costs. *Health Aff* 30(11):2167-2176
- Kyriakis KP, Vareltzidis AG, Tosca AD (1995) Environmental factors influencing the biologic behavior of patterns of pemphigus vulgaris: Epidemiologic approach. *Int J Dermatol* 34(3):181-185
- Laaidi M, Laaidi K, Besancenot JP (2006) Temperature-related mortality in France, a comparison between regions with different climates from the perspective of global warming. *Int J Biometeorol* 51(2):145-153
- Langford IH, Bentham G (1995) The potential effects of climate change on winter mortality in England and Wales. *Int J Biometeorol* 38(3):141-147
- Martens WJ (1995) Climate change and malaria: Exploring the risks. *Med & War* 11(4):202-213
- Martens WJ (1998) Climate change, thermal stress and mortality changes. *Soc Sci Med* 46(3):331-344
- Martin SL, Cakmak S, Hebborn CA, Avramescu ML, Tremblay N (2012) Climate change and future temperature-related mortality in 15 Canadian cities. *Int J Biometeorol* 56(4):605-619
- McGeehin MA, Mirabelli M (2001) The potential impacts of climate variability and change on temperature-related morbidity and mortality in the United States. *Environ Health Perspect* 109(Suppl 2):185-189
- McMichael AJ, Campbell-Lendrum D, Kovats S, Edwards S, Wilkinson P, Wilson T, Nicholls R, Hales S, Tanser F, Le Sueur D, Schlesinger M, Andronova N (2004) Chapter 20 Global Climate Change. In: *Comparative Quantification of Health Risks, Vol 2*. Geneva:WHO, 1543-1650

McMichael AJ, Wilkinson P, Kovats RS, Pattenden S, Hajat S, Armstrong B et al. (2008) International study of temperature, heat and urban mortality: The 'ISOTHURM' project. *Int J Epidemiol* 37(5):1121-1131

Michelozzi P, Accetta G, De Sario M, D'Ippoliti D, Marino C, Baccini M et al. (2009) High temperature and hospitalizations for cardiovascular and respiratory causes in 12 European cities. *Am J Resp & Critical Care Med* 179(5):383-389

Michelozzi P, de'Donato FK, Bargagli AM, D'Ippoliti D, De Sario M, Marino C et al. (2010) Surveillance of summer mortality and preparedness to reduce the health impact of heat waves in Italy. *Int J Environ Res & Public Health* 7(5):2256-2273

Montero JC, Miron IJ, Criado-Alvarez JJ, Linares C, Diaz J (2012) Influence of local factors in the relationship between mortality and heat waves: Castile-la mancha (1975-2003). *Sci Total Environ* 414:73-80

Myung HN, Jang JY (2011) Causes of death and demographic characteristics of victims of meteorological disasters in Korea from 1990 to 2008. *Environ Health* 10:82

National Collaborating Centre for Methods and Tools (2010) Guidelines for selecting and using indicators. Hamilton, ON: McMaster University. <http://www.nccmt.ca/registry/view/eng/73.html>. Accessed January 3, 2013

National Environmental Public Health Tracking Program (2012) CDC Query and Results. <http://ephtracking.cdc.gov/showLocationLanding.action>. Accessed March 6, 2013

National Research Council Board on Atmospheric Sciences and Climate (2010) Monitoring Climate Change Impacts: Metrics at the Intersection of the Human and Earth Systems. Washington, DC: The National Academies Press. [http://www.nap.edu/openbook.php?record\\_id=12965&page=R1](http://www.nap.edu/openbook.php?record_id=12965&page=R1). Accessed January 3, 2013

NHS Institute for Innovation and Improvement (2008) The Good Indicators Guide: Understanding how to use and choose indicators. <http://www.apho.org.uk/resource/item.aspx?RID=44584>. Accessed January 4, 2013

Ogden NH, Lindsay LR, Morshed M, Sockett PN, Artsob H (2008) The rising challenge of lyme borreliosis in Canada. *Can Commun Dis Rep* 34(1):1-19

O'Neill MS, Hajat S, Zanobetti A, Ramirez-Aguilar M, Schwartz J (2005) Impact of control for air pollution and respiratory epidemics on the estimated associations of temperature and daily mortality. *Int J Biometeorol* 50(2):121-129

O'Neill MS, Zanobetti A, Schwartz J (2003) Modifiers of the temperature and mortality association in seven US cities. *Am J Epidemiol* 157(12):1074-1082

Ontario District Health Councils Local Health System Monitoring Technical Working Group (No date) Process Guide for Health Indicator Selection. <http://www.ontla.on.ca/library/repository/mon/24001/298297.pdf>. Assessed 15 December 2012

Park AK, Hong YC, Kim H (2011) Effect of changes in season and temperature on mortality associated with air pollution in Seoul, Korea. *J Epidemiol & Community Health* 65(4):368-375

Pengelly LD, Campbell ME, Cheng CS, Fu C, Gingrich SE, Macfarlane R (2007) Anatomy of heat waves and mortality in Toronto: Lessons for public health protection. *Can J Public Health* 98(5):364-368

Peron Y, Strohmenger C (1985) Demographic and Health Indicators: Presentation and Interpretation. Catalogue No. 82-543. Ottawa:Statistics Canada

Reacher M, McKenzie K, Lane C, Nichols T, Kedge I, Iversen A et al. (2004) Health impacts of flooding in Lewes: A comparison of reported gastrointestinal and other illness and mental health in flooded and non-flooded households. *Commun Dis & Public Health* 7(1):39-46

Revich BA, Shaposhnikov DA (2010) Extreme temperature episodes and mortality in Yakutsk, East Siberia. *Rural & Remote Health* 10(2):1338

Reyburn R, Kim DR, Emch M, Khatib A, von Seidlein L, Ali M (2011) Climate variability and the outbreaks of cholera in Zanzibar, East Africa: A time series analysis. *Am J Trop Med & Hyg* 84(6):862-869

Robine JM, Cheung SL, Le Roy S, Van Oyen H, Griffiths C, Michel JP et al. (2008) Death toll exceeded 70,000 in Europe during the summer of 2003. *Comptes Rendus Biologies* 331(2):171-178

Rocklov J, Forsberg B (2010) The effect of high ambient temperature on the elderly population in three regions of Sweden. *Int J Environ Res & Public Health* 7(6):2607-2619

- Russell RC, Currie BJ, Lindsay MD, Mackenzie JS, Ritchie SA, Whelan PI (2009) Dengue and climate change in Australia: Predictions for the future should incorporate knowledge from the past. *Med J Aust* 190(5):265-268
- Seguin J, ed. (2008) *Human Health in a Changing Climate: A Canadian Assessment of Vulnerabilities and Adaptive Capacity*. Ottawa:Health Canada
- Shea KM, Truckner RT, Weber RW, Peden DB (2008) Climate change and allergic disease. *J Allerg & Clin Immunol* 122(3):443-453
- Sheffield PE, Knowlton K, Carr JL, Kinney PL (2011) Modeling of regional climate change effects on ground-level ozone and childhood asthma. *Am J Prev Med* 41(3):251-257
- Smoyer-Tomic KE, Rainham DG (2001) Beating the heat: Development and evaluation of a Canadian hot weather health-response plan. *Environ Health Perspect* 109(12):1241-1248
- Tagaris E, Liao KJ, DeLucia AJ, Deck L, Amar P, Russell AG (2009) Potential impact of climate change on air pollution-related human health effects. *Environ Sci Technol* 43(13):4979-4988
- Tagaris E, Liao KJ, DeLucia AJ, Deck L, Amar P, Russell AG (2010) Sensitivity of air pollution-induced premature mortality to precursor emissions under the influence of climate change. *Int J Environ Res & Public Health* 7(5):2222-2237
- Tong S, Ren C, Becker N (2010) Excess deaths during the 2004 heatwave in Brisbane, Australia. *Int J Biometeorol* 54(4):393-400
- United States Environmental Protection Agency (2012) *Climate Change Indicators in the United States 2012*. Washington, DC:EPA. <http://www.epa.gov/climatechange/pdfs/climateindicators-full-2012.pdf>. Accessed 28 December 2012
- Wang G, Minnis RB, Belant JL, Wax CL (2010) Dry weather induces outbreaks of human West Nile virus infections. *BMC Infectious Diseases* 10:38
- Wardekker JA, de Jong A, van Bree L, Turkenburg WC, van der Sluijs JP (2012) Health risks of climate change: An assessment of uncertainties and its implications for adaptation policies. *Environ Health* 11:67
- Weiland SK, Husing A, Strachan DP, Rzehak P, Pearce N, ISAAC Phase One Study G (2004) Climate and the prevalence of symptoms of asthma, allergic rhinitis, and atopic eczema in children. *Occup & Environ Med* 61(7):609-615

- West JJ, Fiore AM, Horowitz LW, Mauzerall DL (2006) Global health benefits of mitigating ozone pollution with methane emission controls. *Proc Natl Acad Sci U S A* 103(11):3988-3993
- WHO Regional Office for Europe. (2011) Tools for the monitoring of Parma Conference commitments: report of a meeting Bonn, Germany 25-26 November 2010. Copenhagen:WHO
- Williams S, Nitschke M, Weinstein P, Pisaniello DL, Parton KA, Bi P (2012) The impact of summer temperatures and heatwaves on mortality and morbidity in Perth, Australia 1994-2008. *Environ Int* 40:33-38
- Yi O, Hong YC, Kim H (2010) Seasonal effect of PM(10) concentrations on mortality and morbidity in Seoul, Korea: A temperature-matched case-crossover analysis. *Environ Res* 110(1):89-95
- Yu W, Mengersen K, Hu W, Guo Y, Pan X, Tong S (2011) Assessing the relationship between global warming and mortality: Lag effects of temperature fluctuations by age and mortality categories. *Environ Pollut* 159(7):1789-1793
- Yu W, Mengersen K, Wang X, Ye X, Guo Y, Pan X et al. (2012) Daily average temperature and mortality among the elderly: A meta-analysis and systematic review of epidemiological evidence. *Int J Biometeorol* 56(4):569-581
- Zhang Y, Bi P, Hiller JE (2007) Climate change and disability-adjusted life years. *J Environ Health* 70(3):32-36
- Zhang Y, Bi P, Hiller JE (2008) Weather and the transmission of bacillary dysentery in Jinan, Northern China: A time-series analysis. *Public Health Rep* 123(1):61-66
- Zhang Y, Bi P, Hiller JE, Sun Y, Ryan P (2007) Climate variations and bacillary dysentery in northern and southern cities of China. *J Infect* 55(2):194-200
